# Supplementary material for: The Association between Salivary Metabolites and Gingival Bleeding Score in Healthy Subjects: A Pilot Study
Source: MDPI journal article supplement (doi:10.3390/ijms25105448), 2024-05-17
Supplement: s1 [file s1]

# **Association between salivary metabolites and gingival bleeding score in healthy subjects. A pilot study**

Rita Antonelli<sup>1\*</sup>, Elena Ferrari<sup>2\*</sup>, Mariana Gallo<sup>2</sup>, Tecla Ciociola<sup>3</sup>, Elena Calciolari<sup>1,4</sup>, Alberto Spisni<sup>2#</sup>, Marco Meleti<sup>1</sup>, Thelma A. Pertinhez<sup>2</sup>

<sup>1</sup> Centro Universitario di Odontoiatria, Department of Medicine and Surgery, University of Parma, Parma, Italy

<sup>2</sup> Laboratory of Biochemistry and Metabolomics, Department of Medicine and Surgery, University of Parma, Parma, Italy

<sup>3</sup> Laboratory of Microbiology and Virology, Department of Medicine and Surgery, University of Parma, Parma, Italy

<sup>4</sup> Center for Oral Clinical Research, Institute of Dentistry, Barts and The London School of Medicine and Dentistry, Queen Mary University of London, London UK

\*These two authors contributed equally to this work (Elena Ferrari: co-first author)

#Corresponding author: Alberto Spisni, Department of Medicine and Surgery, University of Parma, Parma, Italy. E-mail: [alberto.spisni@unipr.it](mailto:alberto.spisni@unipr.it)

## **SUPPLEMENTARY MATERIAL**

### ***Contents:***

**Table S1.** Demographic data of the study participants

**Table S2.** Dental/periodontal parameters and whole saliva flow of the study participants

**Table S3.** Eukaryotic and prokaryotic cell counts obtained from whole saliva samples

**Figure S1.** Differences in metabolite concentrations between DOWN and UP groups.

**Figure S2.** Univariate ROC curve analysis for selected metabolite features.

**Table S1.** Demographic data of the study participants

| Subject | Sex    | Age (years) | Height (cm),<br>weight (Kg) | Drugs in the last 12h | Smoke        |
|---------|--------|-------------|-----------------------------|-----------------------|--------------|
| 01      | Male   | 25          | 176, 79                     | /                     | Occasionally |
| 02      | Female | 25          | 160, 57                     | /                     | /            |
| 03      | Male   | 24          | 175, 68                     | /                     | /            |
| 04      | Male   | 23          | 187, 83                     | /                     | /            |
| 05      | Female | 25          | 167, 70                     | /                     | /            |
| 06      | Male   | 25          | 175, 68                     | /                     | /            |
| 07      | Female | 25          | 170, 62                     | /                     | e-cigarette  |
| 08      | Female | 24          | 163, 50                     | Birth-control pill    | /            |
| 09      | Male   | 25          | 183, 80                     | /                     | /            |
| 10      | Female | 25          | 170, 65                     | /                     | /            |
| 11      | Male   | 21          | 175, 72                     | /                     | /            |
| 12      | Female | 24          | 164, 52                     | /                     | Yes (5/die)  |
| 13      | Female | 25          | 170, 62                     | Birth-control pill    | /            |
| 14      | Male   | 23          | 170, 72                     | /                     | /            |
| 15      | Male   | 23          | 170, 63                     | /                     | /            |
| 16      | Male   | 23          | 180, 75                     | /                     | Occasionally |
| 17      | Female | 20          | 177, 64                     | /                     | /            |
| 18      | Female | 24          | 170, 58                     | Antihistamine         | /            |
| 19      | Female | 20          | 165, 60                     | /                     | Yes (5/die)  |
| 20      | Male   | 25          | 175, 65                     | /                     | /            |

**Table S2.** Dental/periodontal parameters and whole saliva flow of the study participants

| Subject | DMFT | PSR | FMBS<br>(%) | FMPS<br>(%) | Whole Saliva Flow<br>(mL/5 min) |
|---------|------|-----|-------------|-------------|---------------------------------|
| 01      | 0    | 1   | 5.7%        | 12.1%       | 3.0                             |
| 02      | 0    | 1   | 7.5%        | 18.4%       | 1.1                             |
| 03      | 1    | 1   | 2.9%        | 16.8%       | 2.3                             |
| 04      | 3    | 1   | 0.7%        | 9.3%        | 2.0                             |
| 05      | 0    | 1   | 11.4%       | 5.0%        | 2.4                             |
| 06      | 2    | 0   | 0%          | 4.3%        | 1.3                             |
| 07      | 0    | 1   | 0.7%        | 8.3%        | 5.0                             |
| 08      | 0    | 1   | 3.6%        | 5.7%        | 1.9                             |
| 09      | 1    | 1   | 0.6%        | 6.8%        | 2.2                             |
| 10      | 5    | 1   | 2.9%        | 19.6%       | 1.1                             |
| 11      | 4    | 1   | 2.8%        | 2.8%        | 1.0                             |
| 12      | 4    | 1   | 2.8%        | 7.7%        | 4.5                             |
| 13      | 2    | 1   | 4.5%        | 24.8%       | 2.4                             |
| 14      | 2    | 1   | 3.5%        | 16.4%       | 5.0                             |
| 15      | 2    | 1   | 4.2%        | 22.4%       | 2.1                             |
| 16      | 3    | 1   | 4.5%        | 23.4%       | 1.2                             |
| 17      | 0    | 1   | 1.4%        | 9.9%        | 1.8                             |
| 18      | 0    | 1   | 6.7%        | 18.8%       | 1.1                             |
| 19      | 2    | 1   | 7.1%        | 22.7%       | 0.9                             |
| 20      | 0    | 1   | 1.9%        | 14.1%       | 3.0                             |

DMFT: Decayed, Missing, and Filled Teeth; PSR: Periodontal Screening and Recording; FMBS: Full Mouth Bleeding Score, FMPS: Full Mouth Plaque Score

**Table S3.** Eukaryotic and prokaryotic cell counts obtained from whole saliva samples

| Subject       | Prokaryotic cells<br>(cell/mL) | Eukaryotic cells<br>(cells/mL) |
|---------------|--------------------------------|--------------------------------|
| 01            | 1.95E+09                       | 7.75E+05                       |
| 02            | 3.71E+09                       | 5.10E+05                       |
| 03            | 1.10E+09                       | 1.35E+05                       |
| 04            | 2.52E+09                       | 1.50E+04                       |
| 05            | N.d.                           | 7.80E+05                       |
| 06            | 1.06E+09                       | 2.85E+05                       |
| 07            | 1.16E+09                       | 3.00E+04                       |
| 08            | 1.17E+09                       | 2.09E+06                       |
| 09            | 2.63E+08                       | 2.40E+05                       |
| 10            | 1.11E+09                       | 7.75E+05                       |
| 11            | 5.46E+08                       | 5.75E+05                       |
| 12            | 9.89E+08                       | 4.40E+05                       |
| 13            | 1.02E+08                       | 7.50E+04                       |
| 14            | 4.05E+08                       | 8.00E+04                       |
| 15            | 7.00E+08                       | 4.70E+05                       |
| 16            | 2.85E+09                       | 1.45E+06                       |
| 17            | 1.51E+09                       | 4.60E+05                       |
| 18            | 3.39E+09                       | 4.95E+05                       |
| 19            | 2.08E+09                       | 2.05E+05                       |
| 20            | 1.71E+08                       | 3.90E+05                       |
| <b>Mean</b>   | <b>1.41E+09</b>                | <b>5.14E+05</b>                |
| <b>St dev</b> | <b>1.07E+09</b>                | <b>5.04E+05</b>                |

N.d. not determined

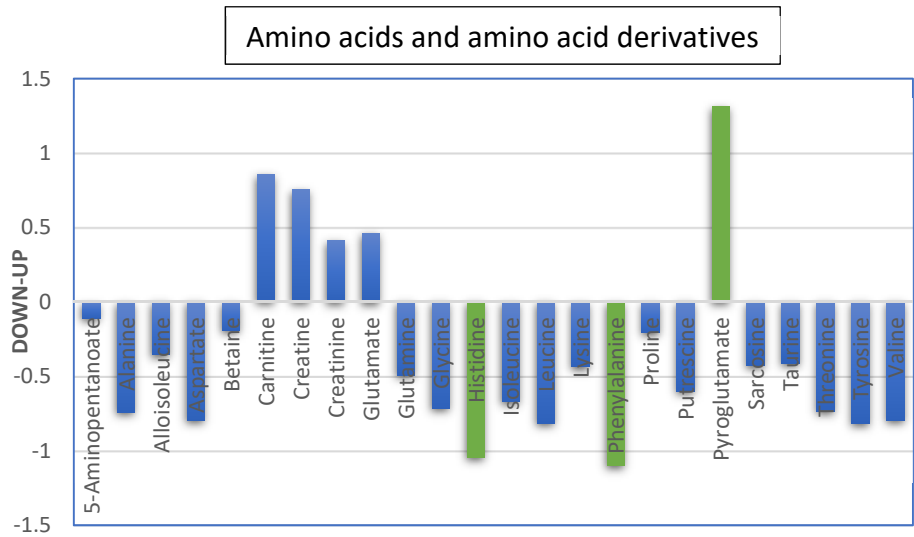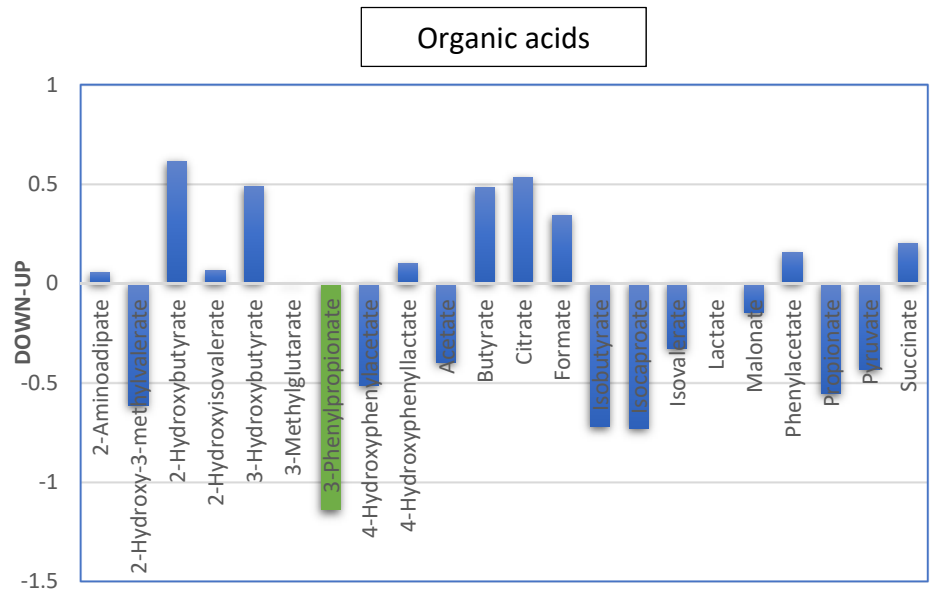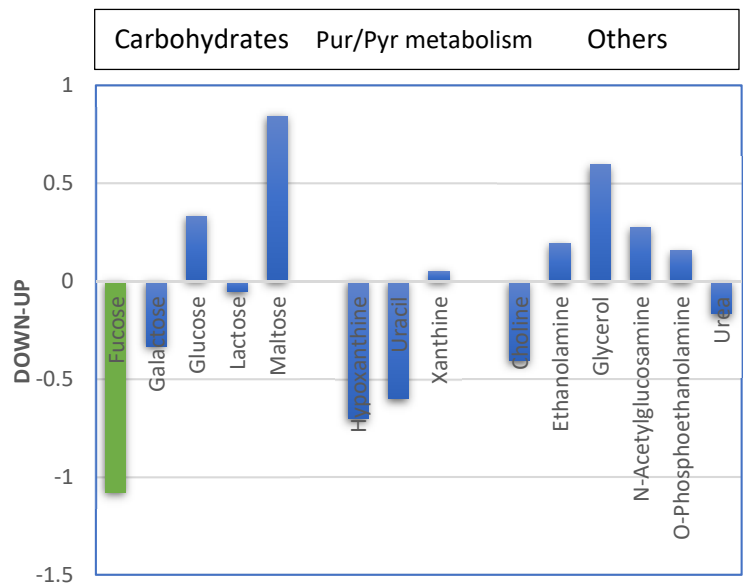

**Figure S1.** Differences in metabolite concentrations between DOWN and UP groups. Metabolite concentrations have been normalized by the median and autoscaled. The graph displays the difference between the mean values obtained for the UP and DOWN groups (DOWN-UP) for all salivary metabolites. The green bars correspond to the metabolites with a DOWN-UP difference higher than  $\pm 1$ , which coincides with the top five VIP metabolites identified by PLS-DA analysis.

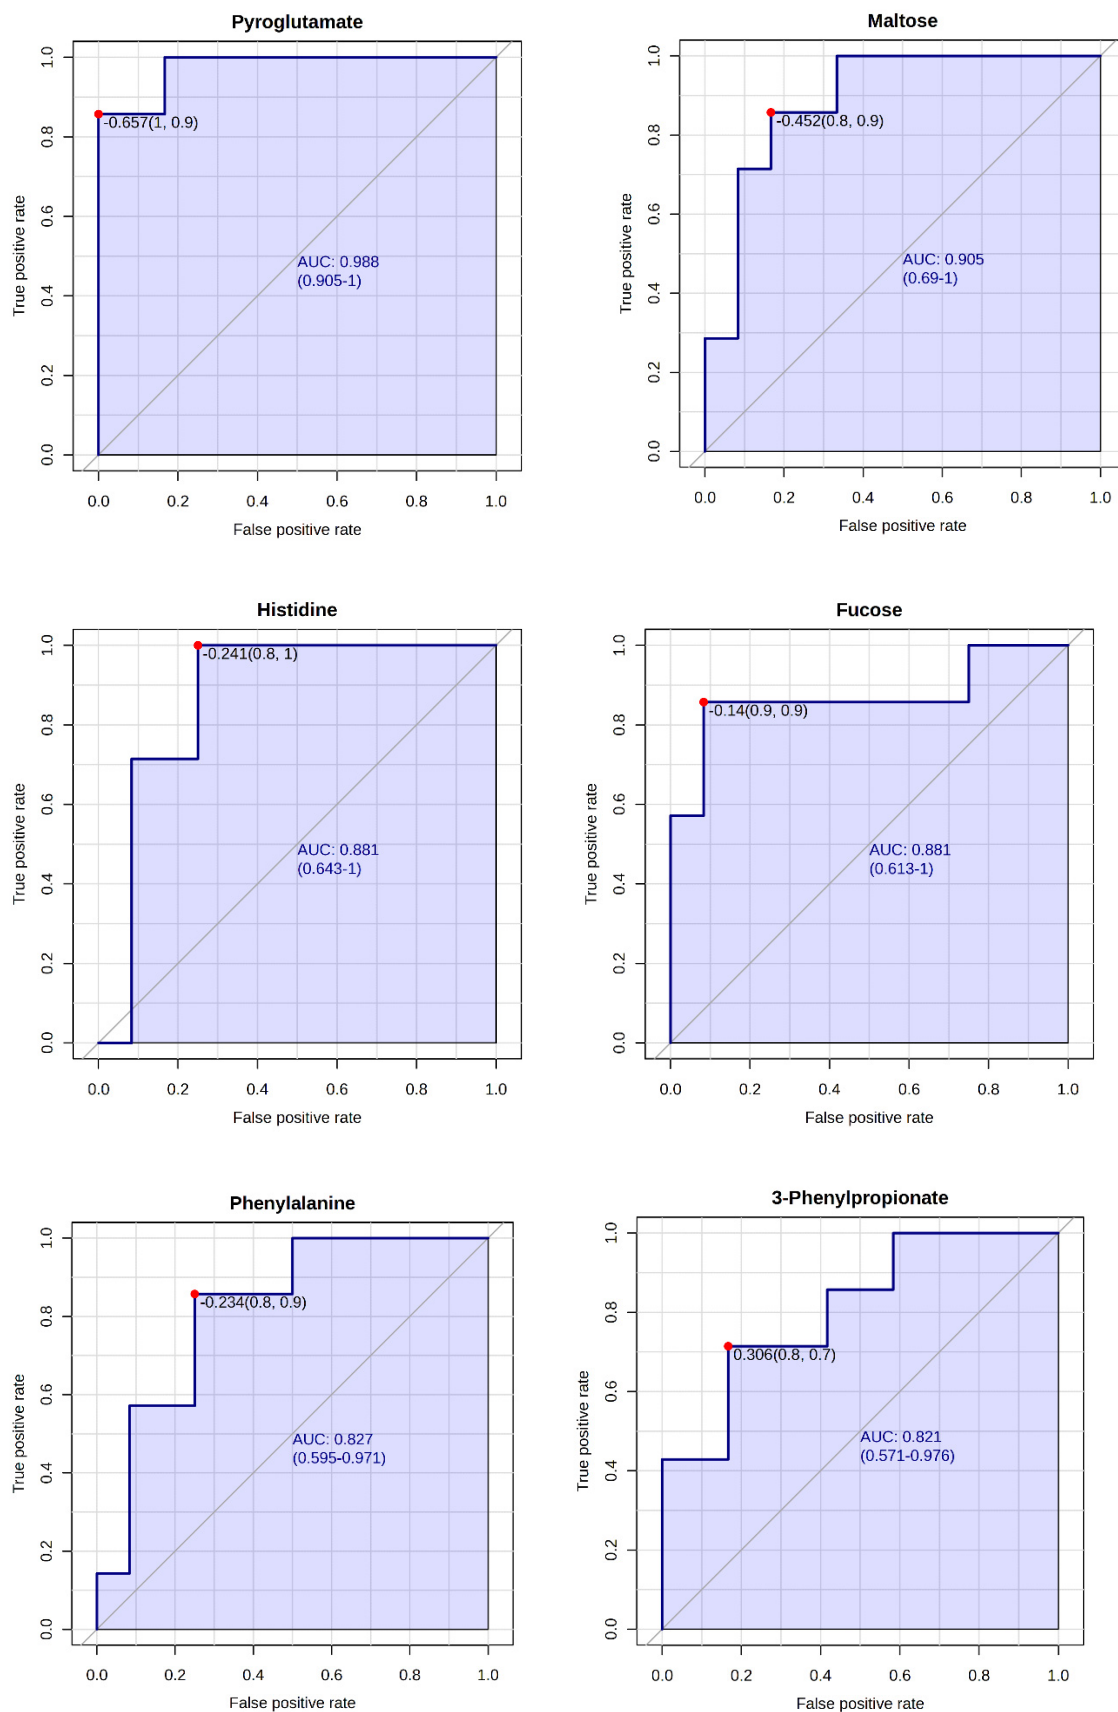

**Figure S2.** Univariate ROC curve analysis for selected metabolite features. The solid red dot indicates the optimal cutoff with the associated sensitivity and specificity values.
